# Supplementary material for: Diazoresin modified monodisperse porous poly(glycidylmethacrylate-co-divinylbenzene) microspheres as the stationary phase for high performance liquid chromatography
Source: Royal Society of Chemistry journal article supplement (doi:10.1039/c6nj04001b), 2017-01-01
Supplement: c6nj04001b1.pdf [file c6nj04001b1.pdf]

**Diazo resin                      modified                      monodisperse                      porous**  
**poly(glycidylmethacrylate-co-divinylbenzene)                      microspheres                      as**  
**stationary phase for high performance liquid chromatography**

Bing Yu,<sup>a,b</sup> Hongbo Zhang,<sup>a</sup> Hailin Cong,<sup>a,b,\*</sup> Chuantao Gu,<sup>a</sup> Lilong Gao,<sup>a</sup> Bo Yang<sup>a</sup> and Muhammad Usman<sup>a</sup>

**Electronic Supplementary Information (ESI) for New Journal of Chemistry**

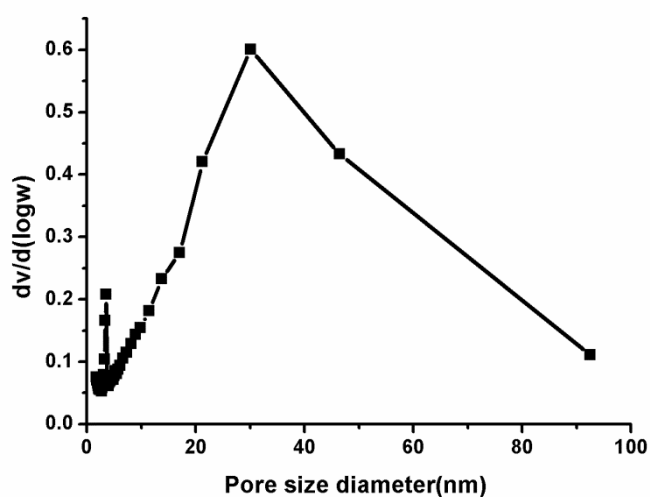

**Fig. S1 The BET data of the PGMA-DVB-DR microspheres**

Pore volume: 10.46 cm<sup>3</sup>/g

BET surface: 186.64 m<sup>2</sup>/g

Average pore size: 15.00 nm
